# Supplementary material
Source: Elsevier journal article supplement (https://www.sciencedirect.com/science/article/pii/S1885585722002109)
Supplement: mmc1 [file S1885585722002109:mmc1.pdf]

## SUPPLEMENTARY DATA

### SUPPLEMENTAL METHODS

#### Genetic sequencing

Samples underwent an automated extraction and purification process to obtain genomic DNA (QIAasympyphony SP, Germany) according to the manufacturer's instructions. Library preparation was carried out using SureSelect Reagent kit (Agilent) for Illumina's paired-end multiplexed sequencing method, following the manufacturer's instructions. The enrichment of the regions of interest was performed by means of a SureSelect (Agilent) probe kit that selectively captures the coding zones and the flanking intronic areas of the selected genes. After the generation of clusters, the DNA libraries were sequenced on the Illumina HiSeq 1500 platform. The analyses of the sequencing data were performed using a proprietary bioinformatics pipeline to obtain a report of variants noted, along with their coverage and corresponding quality parameters.

#### LOD score calculation

We calculated a 2-point logarithm of the odds (LOD) scores for 4 informative families with HCM (Figure 3 and table 4 of the supplementary data) by using the PARMLINK package for R software, computed with the settings  $\theta = 0$ , phenocopy rate = 0.002 (prevalence of the disease in the general population) and indicated disease penetrance (0.95), a model commonly used for an autosomal dominant disease with relatively high penetrance. An indeterminate status was assigned to family members  $\leq 45$  years who did not meet the clinical criteria for HCM and to family members with confounding cardiac diagnoses. The phenocopy rate was adjusted to the prevalence of HCM, since the prevalence of RCM is not well established.

## SUPPLEMENTAL RESULTS

### Genetic analysis

In 2 families, distinct variants of unknown significance were identified. Family A exhibited the RYR2 p.Lys103Arg variant catalogued as a variant of unknown significance. The variant was identified in the proband and her mother, who did not exhibit catecholaminergic polymorphic ventricular tachycardia or HCM/RCM/LVHT phenotype. This variant is very rare in population databases, but no other criteria support a pathogenic or likely pathogenic interpretation.

#### Family A

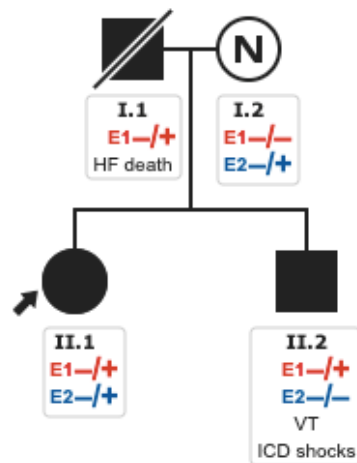

|  |                                |           |                                                |
|--|--------------------------------|-----------|------------------------------------------------|
|  | HCM/RCM<br>Clinically affected | <b>E1</b> | FLNC (g.128492882G>A, c.6005G>A, p.Gly2002Glu) |
|  | HCM/RCM<br>Not affected        | <b>E2</b> | RYR2 (g.237527671A>G, c.308A>G, p.Lys103Arg)   |

"+/+" = Homozygous, "-/+" = Heterozygous, "+-" = Hemizygous, "-/-" = Not found, "--" = Not found

In family B, which is a “de novo” presentation, we found MYBPC3\_p.Gly596Arg and RYR2\_p.Met4279Ile. Both were catalogued as variants of unknown significance. The RYR2 variant was only found in the proband and he did not show the CPVT phenotype. Regarding the MYBPC3 variant, it was also catalogued as a variant of unknown significance. This variant has a low frequency in the general population and it is suggested to be a variant of unknown significance or likely benign by the few submissions in ClinVar. The MYBPC3 was present in the mother but she did not manifest any cardiac phenotype. This information is added to the supplementary data.

### Family B

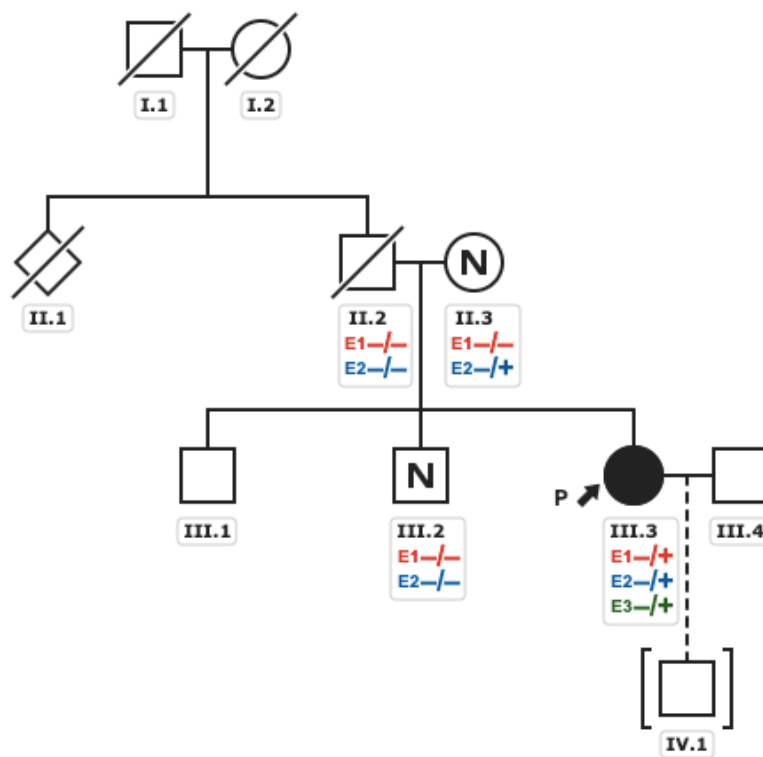

|  |                                                      |           |                                                                                                                                                     |
|--|------------------------------------------------------|-----------|-----------------------------------------------------------------------------------------------------------------------------------------------------|
|  | Non-compaction cardiomyopathy<br>Clinically affected | <b>E1</b> | FLNC (g.128492908G>A, c.6031G>A, p.Gly2011Arg)<br>"+/+" = Homozygous, "-/+" = Heterozygous, "+-" = Hemizygous, "-/-" = Not found, "--" = Not found  |
|  | Non-compaction cardiomyopathy<br>Not affected        | <b>E2</b> | MYBPC3 (g.47363546C>T, c.1786G>A, p.Gly596Arg)<br>"+/+" = Homozygous, "-/+" = Heterozygous, "+-" = Hemizygous, "-/-" = Not found, "--" = Not found  |
|  |                                                      | <b>E3</b> | RYR2 (g.237947849G>A, c.12837G>A, p.Met4279Ile)<br>"+/+" = Homozygous, "-/+" = Heterozygous, "+-" = Hemizygous, "-/-" = Not found, "--" = Not found |

**Table 1 of the supplementary data**

| Gene     | Protein                                                        |
|----------|----------------------------------------------------------------|
| A2ML1    | alpha-2-macroglobulin-like protein 1                           |
| AARS2    | Alanine-tRNA ligase, mitochondrial                             |
| ABCC9    | ATP-binding cassette, subfamily C (CFTR/MRP), member 9         |
| ACAD9    | Acyl-CoA dehydrogenase family member 9, mitochondrial          |
| ACADVL   | Very long-chain specific acyl-CoA dehydrogenase, mitochondrial |
| ACTA1    | Actin, alfa 1, skeletal muscle                                 |
| ACTC1    | Actin, alpha cardiac muscle 1                                  |
| ACTN2    | Alpha-actinin-2                                                |
| AGK      | Acylglycerol kinase, mitochondrial                             |
| AGL      | Glycogen debranching enzyme                                    |
| AGPAT2   | 1-acyl-sn-glycerol-3-phosphate acyltransferase beta            |
| AKAP9    | A-kinase anchor protein 9                                      |
| AKT1     | RAC-alpha serine/threonine-protein kinase                      |
| ALMS1    | Alstrom syndrome protein 1                                     |
| ALPK3    | alpha-protein kinase 3                                         |
| ANK2     | Ankyrin 2                                                      |
| ANK3     | Ankyrin-3                                                      |
| ANKRD1   | Ankyrin repeat domain-containing protein 1                     |
| ANO5     | Anoctamin-5                                                    |
| ATP5F1E  | ATP synthase subunit epsilon, mitochondrial                    |
| ATPAF2   | ATP synthase mitochondrial F1 complex assembly factor 2        |
| BAG3     | BAG family molecular chaperone regulator 3                     |
| BRAF     | Serine/threonine-protein kinase B-raf                          |
| BSCL2    | Seipin                                                         |
| C10orf71 | Cardiac enriched FHL2-interacting protein                      |
| CACNA1C  | Voltage-dependent L-type calcium channel subunit alpha-1C      |
| CACNA1D  | Voltage-dependent L-type calcium channel subunit alpha-1D      |
| CACNA2D1 | Voltage-dependent calcium channel subunit alpha-2/delta-1      |

|         |                                                               |
|---------|---------------------------------------------------------------|
| CACNB2  | Voltage-dependent L-type calcium channel subunit beta-2       |
| CALM1   | Calmodulin                                                    |
| CALM2   | Calmodulin                                                    |
| CALM3   | Calmodulin                                                    |
| CALR    | Calreticulin                                                  |
| CALR3   | Calreticulin 3                                                |
| CAPN3   | Calpain-3                                                     |
| CASQ2   | Calsequestrin-2                                               |
| CASZ1   | Zinc finger protein castor homolog 1                          |
| CAV3    | Caveolin 3                                                    |
| CAVIN1  | Polymerase I and transcript release factor                    |
| CAVIN4  | Caveolae-associated protein 4                                 |
| CBL     | E3 ubiquitin-protein ligase CBL                               |
| CDH2    | Cadherin-2                                                    |
| CHRM2   | Muscarinic acetylcholine receptor M2                          |
| COA5    | Cytochrome C oxidase assembly factor 5                        |
| COA6    | Cytochrome C oxidase assembly factor 6 homolog                |
| COL7A1  | Collagen alpha-1(VII) chain                                   |
| COQ2    | 4-Hydroxybenzoate polyprenyltransferase, mitochondrial        |
| COX15   | Cytochrome C oxidase assembly protein COX15 homolog           |
| COX6B1  | Cytochrome C oxidase subunit 6B1                              |
| CRYAB   | Alpha-crystallin B chain                                      |
| CSNK1A1 | Casein Kinase 1 Alpha 1                                       |
| CSRP3   | Cysteine and glycine-rich protein 3                           |
| CTNNA1  | Catenin alpha-1                                               |
| CTNNA3  | Catenin alpha-3                                               |
| CTNNB1  | Catenin beta-1                                                |
| DES     | Desmin                                                        |
| DLD     | Dihydrolipoyl dehydrogenase, mitochondrial                    |
| DMD     | Dystrophin                                                    |
| DNAJC19 | Mitochondrial import inner membrane translocase subunit TIM14 |
| DNM1L   | Dynamin-1-like protein                                        |

|         |                                                                  |
|---------|------------------------------------------------------------------|
| DOLK    | Dolichol kinase                                                  |
| DSC2    | Desmocollin 2                                                    |
| DSG2    | Desmoglein 2                                                     |
| DSP     | Desmoplakin                                                      |
| DTNA    | Dystrobrevin alpha                                               |
| ELAC2   | Zinc phosphodiesterase ELAC protein 2                            |
| EMD     | Emerin                                                           |
| EYA4    | Eyes absent homolog 4                                            |
| FAH     | Fumarylacetoacetase                                              |
| FBXO32  | F-box only protein 32                                            |
| FGF12   | Fibroblast growth factor 12                                      |
| FHL1    | Four and a half LIM domains protein 1                            |
| FHL2    | Four and a half LIM domains 2 (FHL-2)                            |
| FHOD3   | FH1/FH2 domain-containing protein 3                              |
| FKRP    | Fukutin-related protein                                          |
| FKTN    | Fukutin                                                          |
| FLNC    | Filamin C                                                        |
| FOXD4   | Forkhead box protein D4                                          |
| FOXRED1 | FAD-dependent oxidoreductase domain-containing protein 1         |
| FXN     | Frataxin, mitochondrial                                          |
| GAA     | Lysosomal alpha-glucosidase                                      |
| GATA4   | Transcription factor GATA-4                                      |
| GATA5   | Transcription factor GATA-5                                      |
| GATA6   | Transcription factor GATA-6                                      |
| GATAD1  | GATA zinc finger domain-containing protein 1                     |
| GFM1    | Elongation factor G, mitochondrial                               |
| GJA1    | Gap junction alpha-1 protein                                     |
| GJA5    | Gap junction alpha-5 protein                                     |
| GLA     | Alpha galactosidase A                                            |
| GLB1    | Beta-galactosidase                                               |
| GNB2    | Guanine nucleotide-binding protein G(I)/G(S)/G(T) subunit beta-2 |
| GNPTAB  | N-acetylglucosamine-1-phosphotransferase subunits alpha/beta     |

|        |                                                                                |
|--------|--------------------------------------------------------------------------------|
| GPD1L  | Glycerol-3-phosphate dehydrogenase 1-like protein                              |
| GREM2  | Gremlin-2                                                                      |
| GSK3B  | Glycogen synthase kinase-3 beta                                                |
| GUSB   | Beta-glucuronidase                                                             |
| GYG1   | Glycogenin-1                                                                   |
| HCN4   | Potassium/sodium hyperpolarization-activated cyclic nucleotide-gated channel 4 |
| HFE    | Hereditary hemochromatosis protein                                             |
| HRAS   | GTPase HRas                                                                    |
| IDH2   | Isocitrate dehydrogenase [NADP], mitochondrial                                 |
| ILK    | Integrin-linked protein kinase                                                 |
| IRX3   | Iroquois-class homeodomain protein IRX-3                                       |
| ISM2   | Isthmin-2                                                                      |
| JARID2 | Jumonji (Jmj) A/T-rich interaction domain 2                                    |
| JPH2   | Junctophilin 2                                                                 |
| JUP    | Junction plakoglobin                                                           |
| KAT6B  | Histone acetyltransferase KAT6B                                                |
| KCNA5  | Potassium voltage-gated channel subfamily A member 5                           |
| KCND2  | Potassium voltage-gated channel subfamily D member 2                           |
| KCND3  | Potassium voltage-gated channel subfamily D member 3                           |
| KCNE1  | Potassium voltage-gated channel subfamily E member 1                           |
| KCNE2  | Potassium voltage-gated channel subfamily E member 2                           |
| KCNE3  | Potassium voltage-gated channel subfamily E member 3                           |
| KCNE5  | Potassium voltage-gated channel subfamily E member 1-like protein              |
| KCNH2  | Potassium voltage-gated channel subfamily H member 2                           |
| KCNJ2  | Inward rectifier potassium channel 2                                           |
| KCNJ5  | G protein-activated inward rectifier potassium channel 4                       |
| KCNJ8  | ATP-sensitive inward rectifier potassium channel 8                             |
| KCNK17 | Potassium channel subfamily K member 17                                        |
| KCNK3  | potassium channel subfamily K member 3                                         |
| KCNQ1  | Potassium voltage-gated channel subfamily KQT member 1                         |
| KLF10  | Krüppel-like factor 10                                                         |
| KLHL24 | Kelch-like protein 24                                                          |

|         |                                                                     |
|---------|---------------------------------------------------------------------|
| KRAS    | GTPase KRas                                                         |
| LAMA2   | Laminin subunit alpha-2                                             |
| LAMA4   | Laminin subunit alpha-4                                             |
| LAMP2   | Lysosome-associated membrane glycoprotein 2                         |
| LDB3    | LIM domain-binding protein 3                                        |
| LDLR    | Low-density lipoprotein receptor                                    |
| LIAS    | Lipoyl synthase, mitochondrial                                      |
| LMNA    | Prelamin-A/C                                                        |
| LMOD2   | Leiomodin-2                                                         |
| LZTR1   | Leucine-zipper-like transcriptional regulator 1                     |
| MAP2K1  | Dual specificity mitogen-activated protein kinase kinase 1          |
| MAP2K2  | Dual specificity mitogen-activated protein kinase kinase 2          |
| MAP3K8  | Mitogen-activated protein kinase kinase kinase 8                    |
| MEF2C   | Myocyte-specific enhancer factor 2C                                 |
| MIB1    | E3 ubiquitin-protein ligase MIB1                                    |
| MIR208A | MicroRNA 208 <sup>a</sup>                                           |
| MIR208B | MicroRNA 208b                                                       |
| MLYCD   | Malonyl-CoA decarboxylase, mitochondrial                            |
| MRPL3   | 39S Ribosomal protein L3, mitochondrial                             |
| MRPL44  | 39S Ribosomal protein L44, mitochondrial                            |
| MRPS22  | 28S Ribosomal protein S22, mitochondrial                            |
| MTO1    | Protein MTO1 homolog, mitochondrial                                 |
| MYBPC3  | Myosin-binding protein C, cardiac-type                              |
| MYBPHL  | Myosin-binding protein H-like                                       |
| MYH11   | Myosin-11                                                           |
| MYH6    | Myosin-6                                                            |
| MYH7    | Myosin-7                                                            |
| MYL2    | Myosin regulatory light chain 2, ventricular/cardiac muscle isoform |
| MYL3    | Myosin light chain 3                                                |
| MYLK2   | Myosin light chain kinase 2, skeletal/cardiac muscle                |
| MYOM1   | Myomesin-1                                                          |
| MYOT    | Myotilin                                                            |

Bermúdez-Jiménez FJ, *et al.* *ROD2 domain filamin C missense mutations exhibit a distinctive cardiac phenotype with restrictive/hypertrophic cardiomyopathy and saw-tooth myocardium*  
*Rev Esp Cardiol.* 2022

|          |                                                                                |
|----------|--------------------------------------------------------------------------------|
| MYOZ2    | Myozenin-2                                                                     |
| MYPN     | Myopalladin                                                                    |
| NEBL     | Nebulette                                                                      |
| NEXN     | Nexilin                                                                        |
| NF1      | Neurofibromin                                                                  |
| NKX2-5   | Homeobox protein Nkx-2.5                                                       |
| NKX2-6   | Homeobox protein Nkx-2.6                                                       |
| NNT      | NAD(P) transhydrogenase, mitochondrial                                         |
| NONO     | Non-POU domain-containing octamer-binding protein                              |
| NOS1AP   | Carboxyl-terminal PDZ ligand of neuronal nitric oxide synthase protein         |
| NOTCH1   | Neurogenic locus notch homolog protein 1                                       |
| NPPA     | Atrial natriuretic factor                                                      |
| NRAP     | Nebulin-related anchoring protein                                              |
| NRAS     | GTPase NRas                                                                    |
| OBSCN    | Obscurin                                                                       |
| OBSL1    | Obscurin-like protein 1                                                        |
| OPA3     | Optic atrophy 3 protein                                                        |
| PDHA1    | Pyruvate dehydrogenase E1 component subunit alpha, somatic form, mitochondrial |
| PDLIM3   | PDZ and LIM domain protein 3                                                   |
| PERP     | p53 Apoptosis effector related to PMP-22                                       |
| PHKA1    | Phosphorylase b kinase regulatory subunit alpha, skeletal muscle isoform       |
| PITX2    | Pituitary homeobox 2                                                           |
| PKD2     | Polycystin-2                                                                   |
| PKP2     | Plakophilin 2                                                                  |
| PKP4     | Plakophilin 4                                                                  |
| PLN      | Cardiac phospholamban                                                          |
| PMM2     | Phosphomannomutase 2                                                           |
| PPA2     | Inorganic pyrophosphatase 2, mitochondrial                                     |
| PPCS     | phosphopantothenate--cysteine ligase                                           |
| PPP1CB   | Serine/threonine-protein phosphatase PP1-beta catalytic subunit                |
| PPP1R13L | relA-associated inhibitor                                                      |
| PRDM16   | PR domain zinc finger protein 16                                               |

|         |                                                              |
|---------|--------------------------------------------------------------|
| PRKAG2  | 5'-AMP-activated protein kinase subunit gamma-2              |
| PSEN1   | Presenilin-1                                                 |
| PSEN2   | Presenilin-2                                                 |
| PTPN11  | Tyrosine-protein phosphatase nonreceptor type 11             |
| QRSL1   | Glutamyl-tRNA(Gln) amidotransferase subunit A, mitochondrial |
| RAF1    | RAF proto-oncogene serine/threonine-protein kinase           |
| RANGRF  | Ran guanine nucleotide release factor                        |
| RASA1   | Ras GTPase-activating protein 1                              |
| RASA2   | Ras GTPase-activating protein 2                              |
| RBM20   | RNA-binding motif protein 20                                 |
| RBM24   | RNA-binding protein 24                                       |
| RIT1    | GTP-binding protein Rit1                                     |
| RRAS    | RAS related                                                  |
| RYR2    | Ryanodine Receptor 2                                         |
| SCN5A   | Sodium Voltage-Gated Channel Alpha Subunit 5                 |
| SCO2    | Synthesis Of Cytochrome C Oxidase 2                          |
| SDHA    | Succinate Dehydrogenase Complex Flavoprotein Subunit A       |
| SGCA    | Sarcoglycan alpha                                            |
| SGCB    | Sarcoglycan beta                                             |
| SGCD    | Sarcoglycan delta                                            |
| SGCG    | Sarcoglycan gamma                                            |
| SHOC2   | SHOC2 leucine rich repeat scaffold protein                   |
| SLC22A5 | Solute carrier family 22 member 5                            |
| SLC25A3 | Solute carrier family 25 member 3                            |
| SLC25A4 | Solute carrier family 25 member 4                            |
| SOS1    | SOS Ras/Rac guanine nucleotide exchange factor 1             |
| SOS2    | SOS Ras/Rho guanine nucleotide exchange factor 2             |
| SPEG    | Striated muscle enriched protein kinase                      |
| SPRED1  | Sprouty related EVH1 domain containing 1                     |
| SPRY1   | Sprouty RTK signaling antagonist 1                           |
| SURF1   | SURF1 cytochrome c oxidase assembly factor                   |
| SYNE1   | Spectrin repeat containing nuclear envelope protein 1        |

|          |                                                       |
|----------|-------------------------------------------------------|
| SYNE2    | Spectrin repeat containing nuclear envelope protein 2 |
| SYNGAP1  | Synaptic ras GTPase-activating protein 1              |
| TAZ      | Tafazzin, phospholipid-lysophospholipid transacylase  |
| TBX20    | T-Box transcription factor 20                         |
| TCAP     | Titin-cap                                             |
| TGFB3    | Transforming growth factor beta 3                     |
| TMEM43   | Transmembrane Protein 43                              |
| TMEM70   | Transmembrane Protein 70                              |
| TMOD1    | Tropomodulin 1                                        |
| TNNC1    | Troponin C1                                           |
| TNNI3    | Troponin I3                                           |
| TNNI3K   | TNNI3 interacting kinase                              |
| TNNT2    | Troponin T2                                           |
| TOR1AIP1 | Torsin 1A interacting protein 1                       |
| TPM1     | Tropomyosin 1                                         |
| TRIM54   | Tripartite motif containing 54                        |
| TRIM63   | Tripartite motif containing 63                        |
| TSFM     | Ts translation elongation factor, mitochondrial       |
| TTN      | Titin                                                 |
| TTR      | Transthyretin                                         |
| TXNRD2   | Thioredoxin Reductase 2                               |
| VCL      | Vinculin                                              |
| WISP1    | Cellular communication network factor 4               |
| WT1      | WT1 transcription factor                              |
| XK       | X-linked kx blood group                               |
| ZBTB17   | Zinc finger and BTB domain containing 17              |

**Table 2 of the supplementary data**

| Antibodies                                    | Pretreatment                                                                     | Dilution<br>Incubation time            | Reference                                |
|-----------------------------------------------|----------------------------------------------------------------------------------|----------------------------------------|------------------------------------------|
| Rabbit monoclonal<br>antidesmin,<br>clone Y66 | Buffer EDTA pH8<br>25 min at 95 °C                                               | 1:75 PBS+tween20<br>Overnight at 4 °C  | Abcam<br>Cat. No: ab32362                |
| Rabbit anti-collagen<br>type I                | Pepsin<br>10 min at 37°C                                                         | 1:500 PBS+tween20<br>1.5 h r/t         | ACRIS<br>Cat. No: R1038                  |
| Rabbit polyclonal<br>anti-filamin C           | Buffer citrate pH6<br>25 min at 95 °C<br>0.2% Triton X-100<br>(permeabilization) | 1:100 PBS+tween20<br>Overnight at 4 °C | Abcam<br>Cat. No:<br>ABIN1714758         |
| Rabbit polyclonal<br>Anticonnexin<br>43/GJA1  | Buffer citrate pH6<br>25 min at 95 °C                                            | 1:5000 PBS+tween20<br>1 h r/t          | Abcam<br>Cat. No: ab11370                |
| Immpress antimouse<br>IgG<br>(peroxidase)     | -                                                                                | Ready-to-use<br>30 min                 | Vector Laboratories<br>Cat. no.: MP 7402 |
| Immpress antirabbit<br>IgG<br>(peroxidase)    | -                                                                                | Ready-to-use<br>30 min                 | Vector Laboratories<br>Cat. No.: MP-7401 |

**Table 3 of the supplementary data**

| Name            | Sequence (5'-3')             | Application |
|-----------------|------------------------------|-------------|
| FLNC-P2301L-for | CAGTGAAGTGAAGAGGCTGCCGGGCAC  | SDM         |
| FLNC-P2301L-rev | GTGCCCCGGCAGCCTCTTTCAGTTCAGT | SDM         |
| FLNC-E2334K-for | CGGCGTGCCAGCCAAGTTCAGCATCTG  | SDM         |
| FLNC-E2334K-rev | CAGATGCTGAAGTTGGCTGGCAGCCG   | SDM         |
| FLNC-E2340W-for | AGCATCTGGACCTGGGAGGCTGGC     | SDM         |
| FLNC-E2340W-rev | CGCCAGCCTCCAGGTCCAGATGCT     | SDM         |
| CMV-for         | CGCAAATGGGCGGTAGGCGTG        | Sequencing  |
| FLNC-c.536-for  | CAACTTCAACCGTGACTGGCAG       | Sequencing  |
| FLNC-c.1065-for | GGCCAGAACATTGAACGCAGTC       | Sequencing  |
| FLNC-c.1659-for | TACGCCATCCCTCGCAGC           | Sequencing  |
| FLNC-c.2295-for | GCGGGTAAAGGTGTACGGC          | Sequencing  |
| FLNC-c.2813-for | GCAACATGGCAGTGACAGTGAC       | Sequencing  |
| FLNC-c.3346-for | CATGTGCTGTGAGTACCTGC         | Sequencing  |
| FLNC-c.3863-for | GACGGCTCGTGTGCTCAAC          | Sequencing  |
| FLNC-c.4394-for | CACAGTGGACTGCAGTCAAGC        | Sequencing  |
| FLNC-c.5278-for | TGTGAGCTCCCCTTTCTGCAC        | Sequencing  |
| FLNC-c.5730-for | GAGTCATCACCTGTGATCTTGGC      | Sequencing  |
| FLNC-c.6244-for | CAGGCACGTGCTTGTGAGC          | Sequencing  |
| FLNC-c.6763-for | CCACGGTACTTGACAGCGAC         | Sequencing  |
| FLNC-c.7267-for | CTTGTCAGTGTCCAGCTCAGAGAC     | Sequencing  |
| FLNC-c.7671-for | GCCTCGGACCAGTGACCTTG         | Sequencing  |
| M13-rev         | CAGGAAACAGCTATGACC           | Sequencing  |

SDM, Site-directed mutagenesis.

**Table 4 of the supplementary data**

| Pedigree           | FLNC variant | LOD score 95% |
|--------------------|--------------|---------------|
| A                  | Gly2002Glu   | 0.1738        |
| B                  | Gly2011Arg   | 0             |
| C                  | Gly2320Arg   | 0.9325        |
| D                  | Glu2334Lys   | 0             |
| E                  | Arg2340Trp   | 0             |
| F                  | Glu2334Lys   | 0             |
| G                  | Pro2301Leu   | 0             |
| H                  | Gly2011Arg   | 0.4367        |
| I                  | Thr1823Ala   | 0.1661        |
| J                  | Ser1955Leu   | 0.556         |
| K                  | Ala2510Val   | 0.11          |
| Combined LOD score |              | 2.3725*       |

LOD score 95%, logarithm of the odds score calculated for a disease penetrance of 95%.

\*Suggestive linkage ( $P < .001$ ).

**Table 5 of the supplementary data**

| Variant    | Family | Fulfilled ACMG criteria     | Classification                    |
|------------|--------|-----------------------------|-----------------------------------|
| Gly2002Glu | A      | PM2; PP3                    | Variant of uncertain significance |
| Gly2011Arg | B, H   | PS2 <sup>a</sup> ; PM2; PP3 | Likely pathogenic                 |
| Gly2320Arg | C      | PM2; PP3; PP1 <sup>b</sup>  | Variant of uncertain significance |
| Glu2334Lys | D, F   | PS2 <sup>a</sup> ; PM2; PP3 | Likely pathogenic                 |
| Arg2340Trp | E      | PS2 <sup>a</sup> ; PM2; PP3 | Likely pathogenic                 |
| Pro2301Leu | G      | PS2 <sup>a</sup> ; PM2; PP3 | Likely pathogenic                 |
| Thr1823Ala | I      | PM2; PP3                    | Variant of uncertain significance |
| Ser1955Leu | J      | PM2; PP3                    | Variant of uncertain significance |
| Ala2510Val | K      | PM2; PP3                    | Variant of uncertain significance |

The American College of Medical Genetics and Genomics.

<sup>a</sup> PS2; strong; Confirmed paternity in 4 of the 5 families with *de novo* variants.

<sup>b</sup> PP1, supporting: LODs = 0.93,  $P < .01$ .

**Table 6 of the supplementary data**

| FLNC variant | MutationTaster | DANN     | FATHMM MKL coding |
|--------------|----------------|----------|-------------------|
| p.Gly2011Arg | 1              | 0,999299 | 0,9902            |
| Pro2301Leu   | 1              | 0,999    | 0,975             |
| Glu2334Lys   | 1              | 0,999    | 0,978             |
| Arg2340Trp   | 0,9999         | 0,998894 | 0,87934           |
| Gly2320Arg   | 1              | 0,998    | 0,965             |
| Gly2002Glu   | 1              | 0,998    | 0,992             |
| Thr1823Ala   | 1              | 0,998    | 0,971             |
| Ser1955Leu   | 1              | 0,999    | 0,980             |
| Ala2510Val   | 1              | 0,999    | 0,966             |

MutationTaster: ranges from 0 to 1. Values close to 1 indicate a high degree of prediction accuracy.  
DANN: the higher the score, the higher the potential pathogenicity of the variant. Values between 0 and 1.  
FATHMM: the higher the score, the higher the potential pathogenicity of the variant. Coding and noncoding variants are scored independently. Values between 0 and 1.

**Figure 1 of the supplementary data.** Patients recruitment flowchart

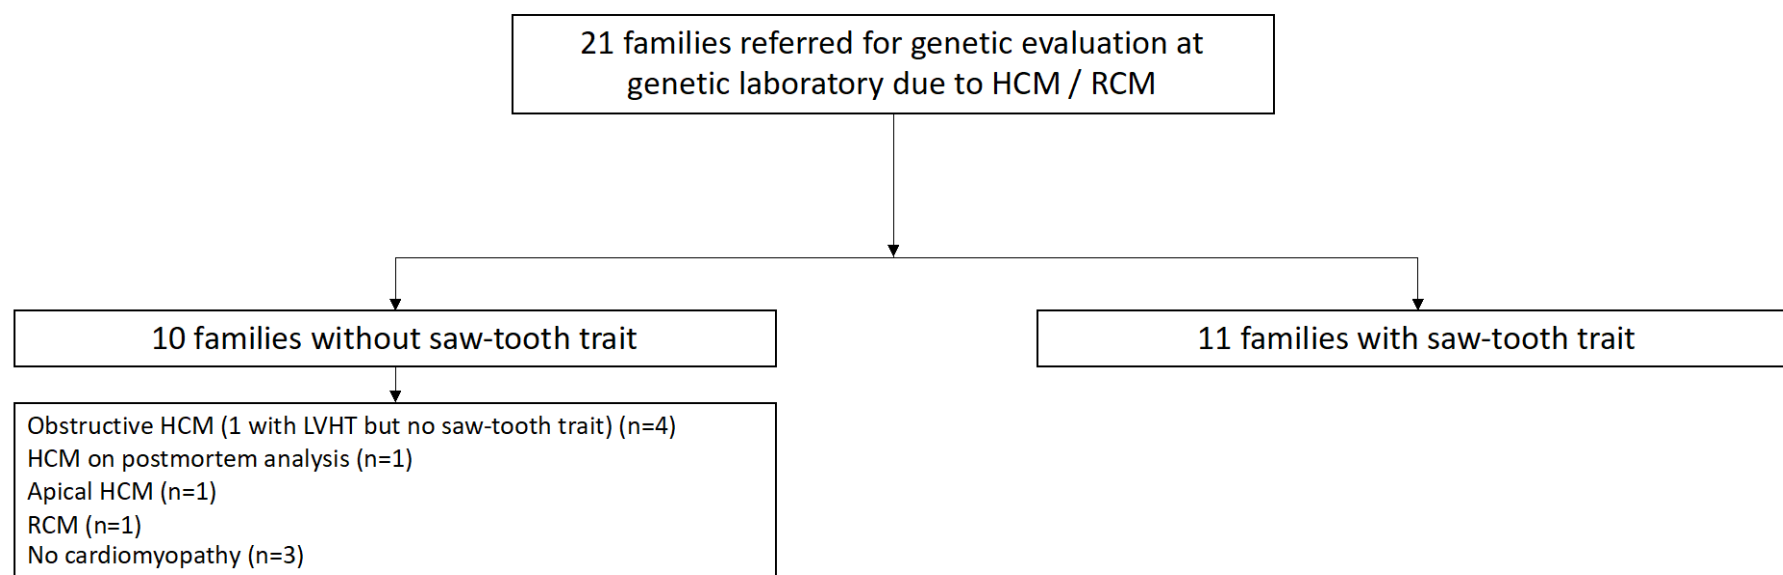

HCM, hypertrophic cardiomyopathy; LVHT, left ventricular hypertrabeculation; n, number; RCM, restrictive cardiomyopathy.

**Figure 2 of the supplementary data.** Family pedigrees of *de novo* variants in *FLNC*

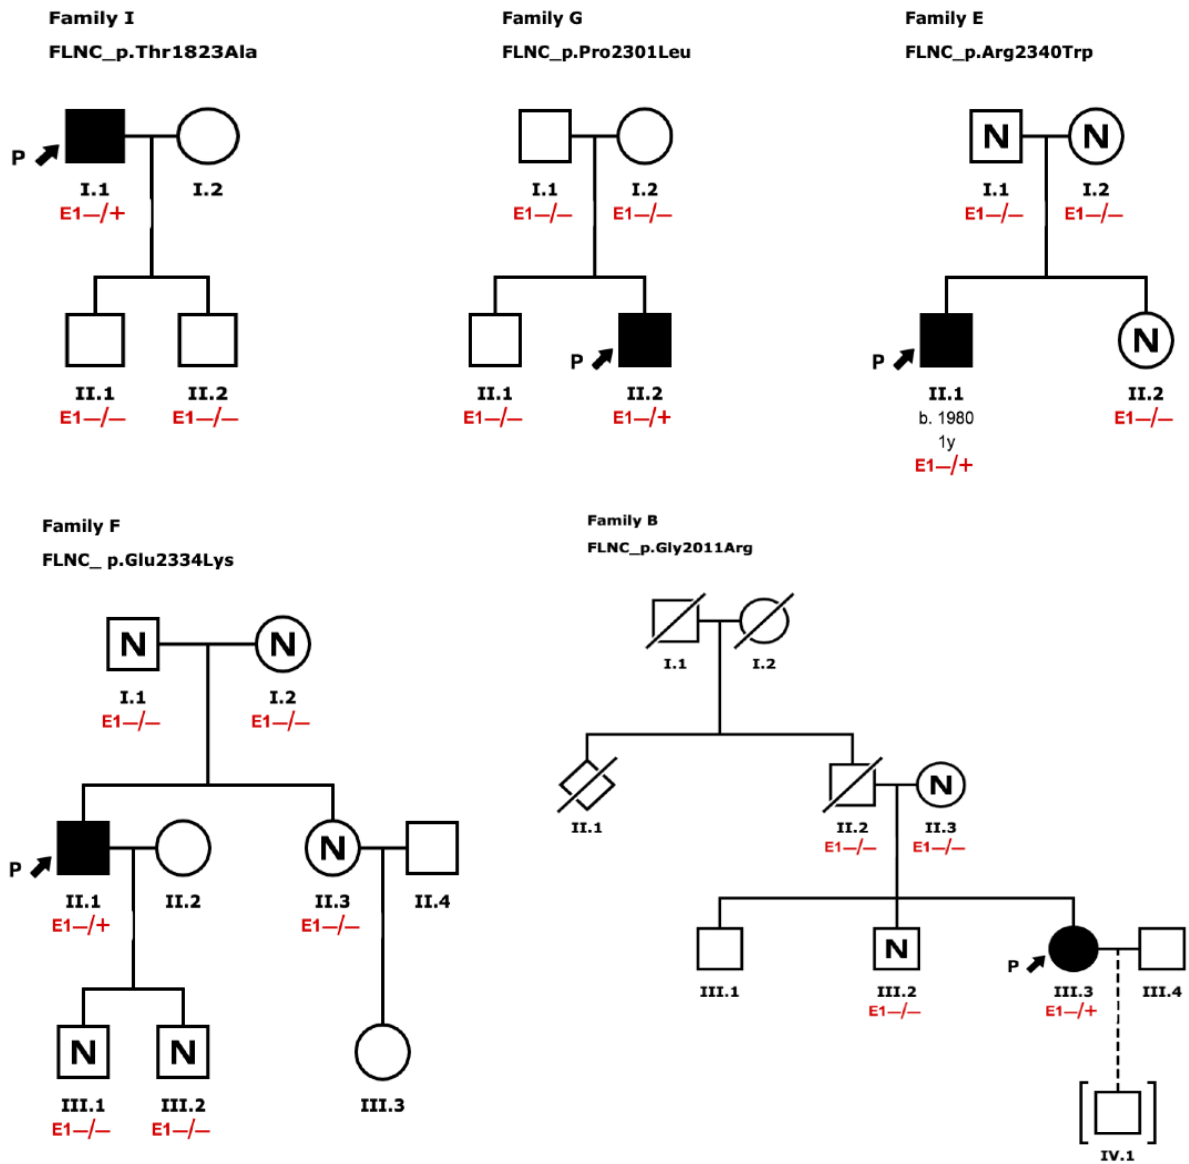

Squares indicate males, circles indicate females, slashes indicate deceased individuals, black shading indicates cardiomyopathy phenotype, N indicates absence of phenotype. The arrows + P indicate the proband. Heterozygous carriers (E1 -/+) and noncarriers (E1 -/-).

**Figure 3 of the supplementary data.** Quantification of collagen and myofibril content

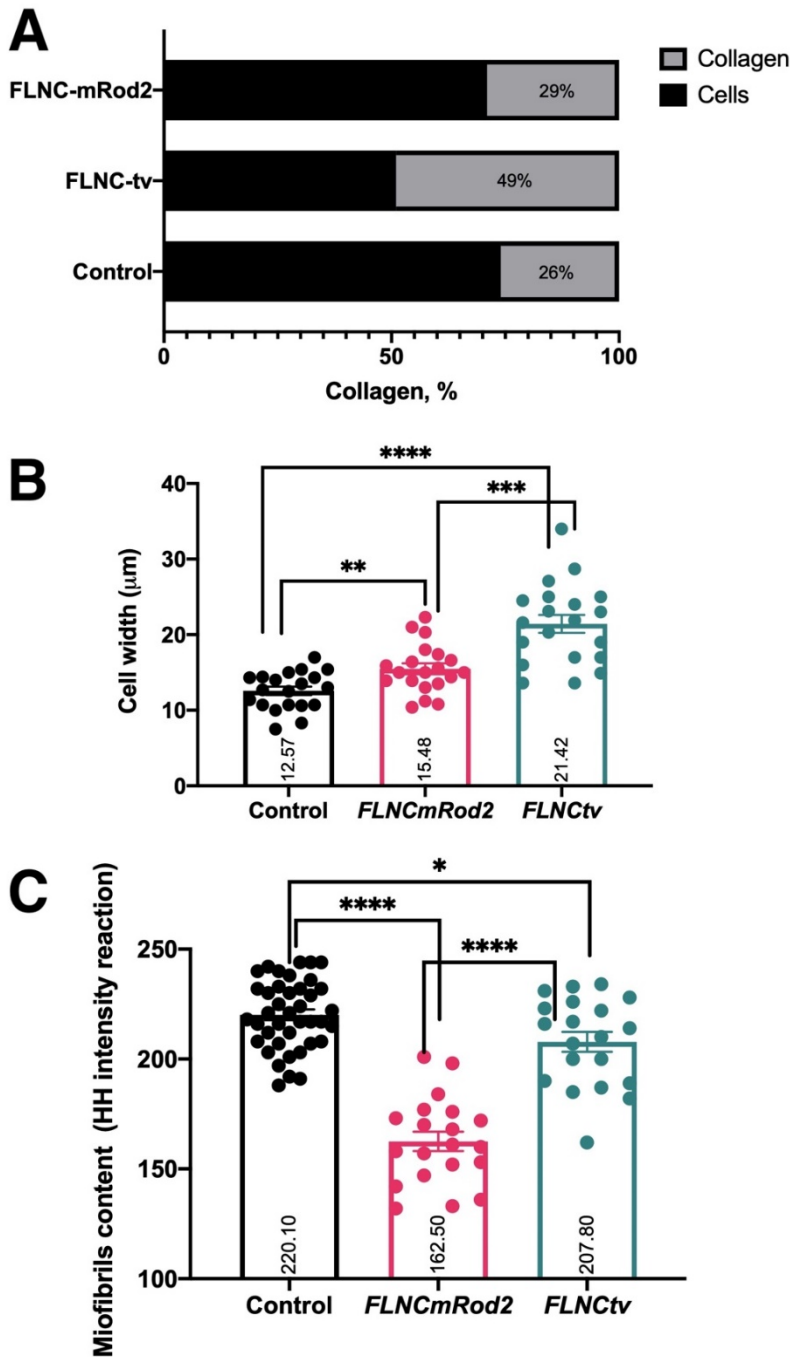

A) Histogram representing collagen content observed in the 3 different conditions analyzed. Filamin C truncating variant (FLNCtv) presented more collagen than control and FLNC-mRod2.; B) Cell width quantification: FLNCtv cells were significantly larger than control and FLNC-mRod2 cells. C) Myofibril content quantifications in the 3 different conditions showed that the control presented significantly more myofibrils than FLNC-tv and FLNC-mRod2, and FLNCmRod2 fewer than FLNC-tv.

\*  $P < .05$ ; \*\* $P < .01$ ; \*\*\* $P < .001$ ; \*\*\*\* $P < .0001$ .

**Figure 4 of the supplementary data.** Comparison of remodeling of the collagen network and fibrotic response

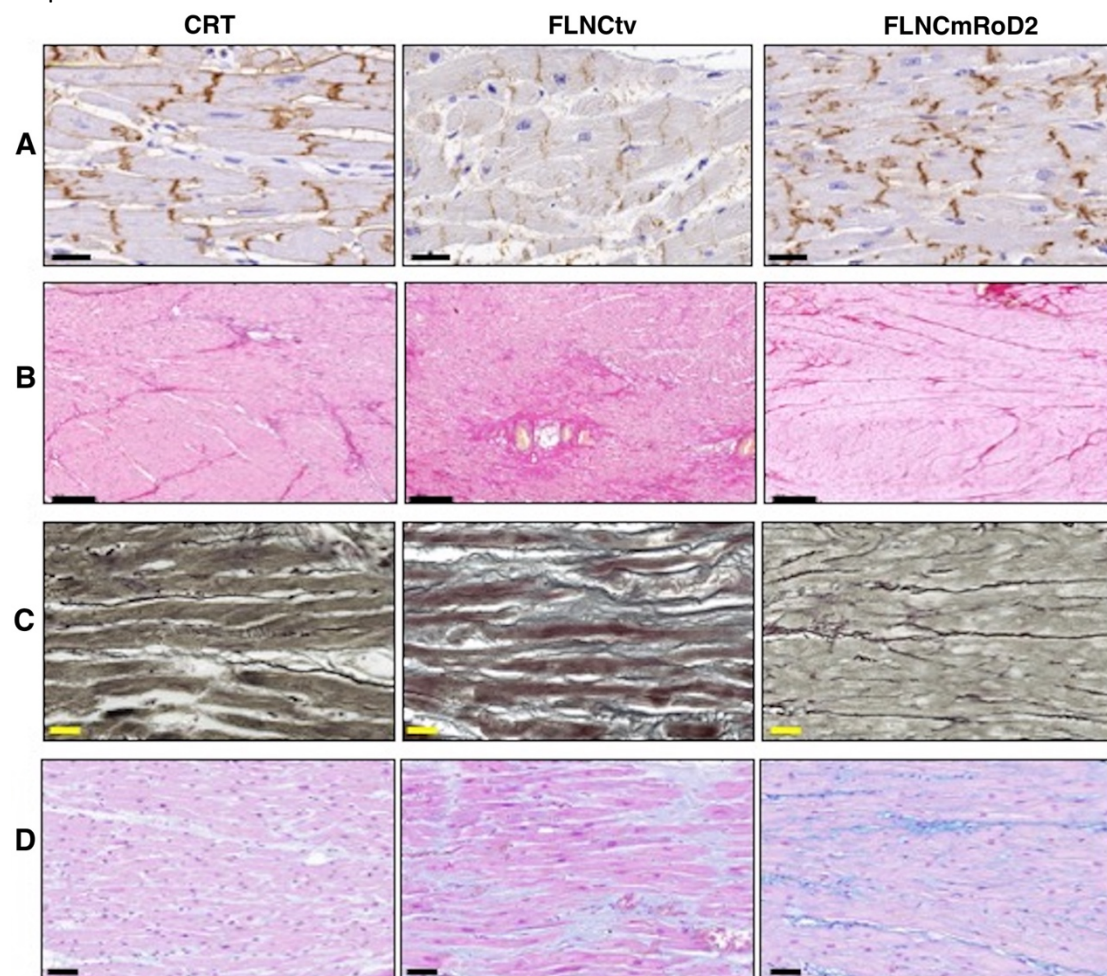

A) Distribution pattern of CX-43 in the intercalary disc of cardiomyocytes; B) Histochemical identification of fibrillar collagens by Picrosirius staining (fibers stained in red), which clearly shows the increase of these fibers in genetically affected samples C) Gomori's metal reduction technique for the identification of reticular fibers (black fibers). D) Alcian blue histochemical staining for acid proteoglycans, which were considerably increased in genetically affected heart samples. Scale barr: 200  $\mu$ m (A-B) and 20  $\mu$ m (C-D).

**Figure 5 of the supplementary data.** Filamin C expression in transfected HT1080 cells

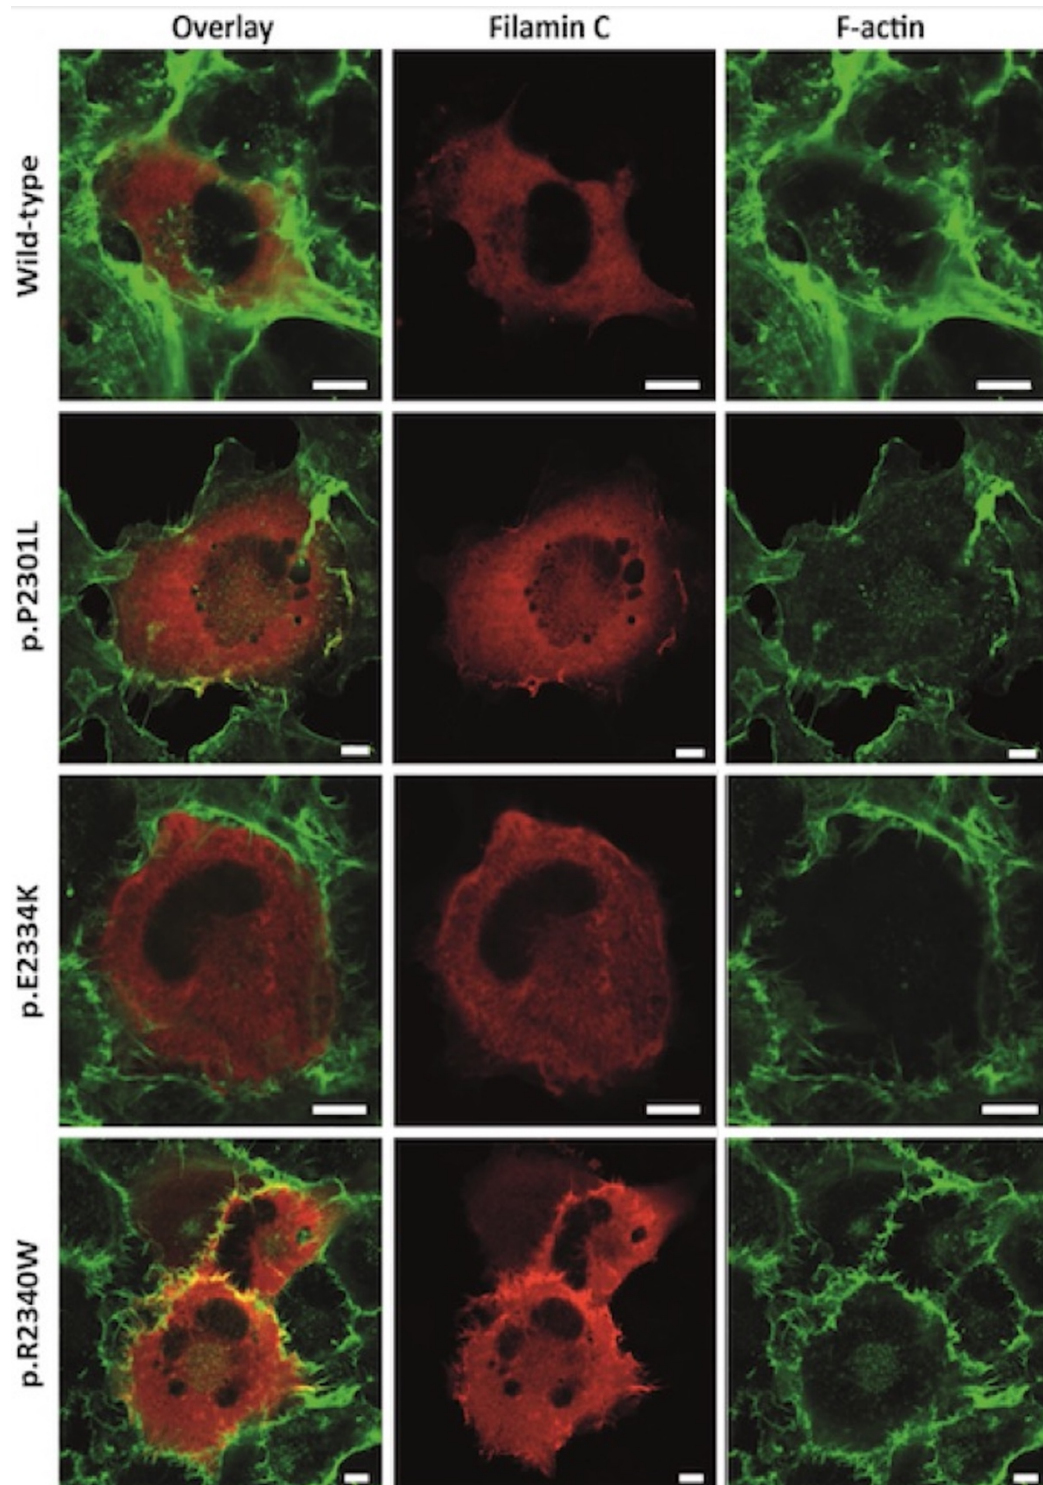

HT1080 cells were transfected with expression plasmids for wild-type and mutant filamin C (p.P2301L, p.E2334K and p.R2340W). c-Myc tagged filamin C is shown in red. F-actin (shown in green) was contained using phalloidin conjugated with Alexa-488. Representative cell images are shown. Scale bars = 10  $\mu$ m.
